# Supplementary material for: Fabrication and integration of quasi-one-dimensional hierarchical TiO2nanotubes for dye-sensitized solar cells
Source: Royal Society of Chemistry journal article supplement (doi:10.1039/c5ce01357g), 2015-01-01
Supplement: c5ce01357g1.pdf [file c5ce01357g1.pdf]

## **Fabrication and integration of quasi-one-dimensional hierarchical**

### **TiO<sub>2</sub> nanotubes for dye-sensitized solar cells**

*Wenjie Mai<sup>a,b,c</sup>, Zhisheng Chai<sup>b</sup>, Jiuwang Gu<sup>b</sup>, Yufei Yuan<sup>b</sup>, Zhigang Zang<sup>a</sup>*

### **Supporting Information**

**Fig. S1.** XRD patterns of P25 powders, HNT arrays on FTO glass and HNT-P25 bilayered configuration on FTO glass.

**Fig. S2.** *J-V* curves of DSSCs based on HNT arrays with different growth times.

**Fig. S3.** Panorama SEM image of the cross-sectional view of HNT array.

**Fig. S4.** UV-Vis absorption spectra of dye desorbed from different photoanodes (P25, HNT and HNT-P25).

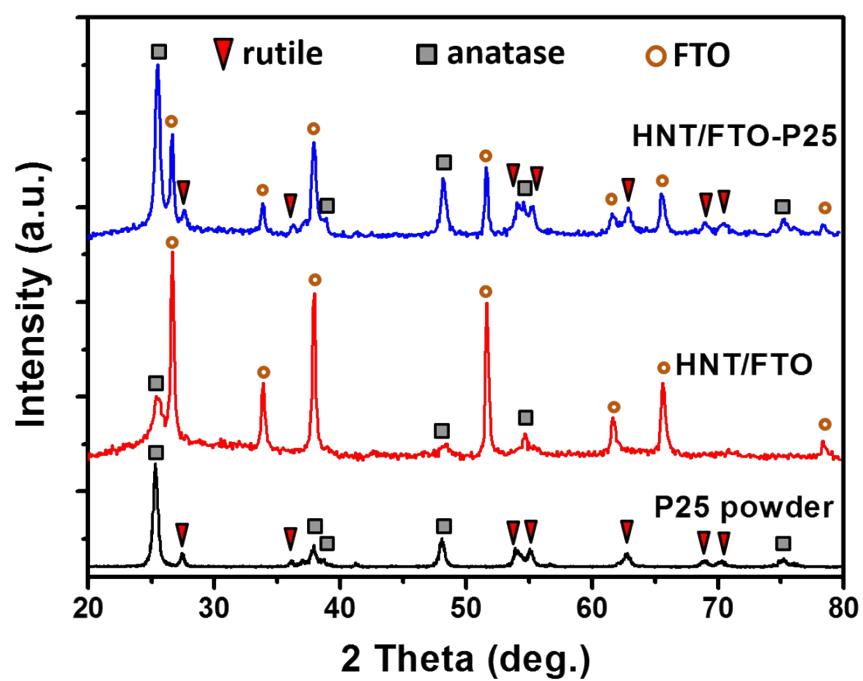

**Fig. S1.** XRD patterns of P25 powders, HNT arrays on FTO glass and HNT-P25 bilayered configuration on FTO glass.

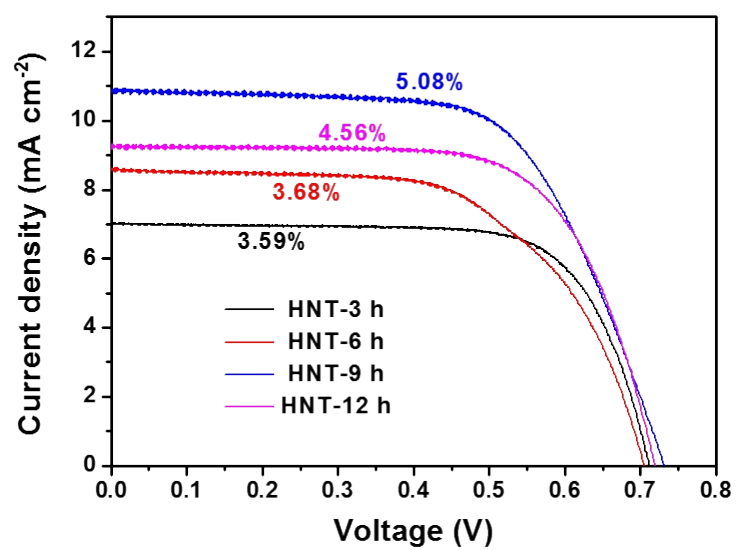

**Fig. S2.** J-V curves of DSSCs based on HNT arrays with different growth times.

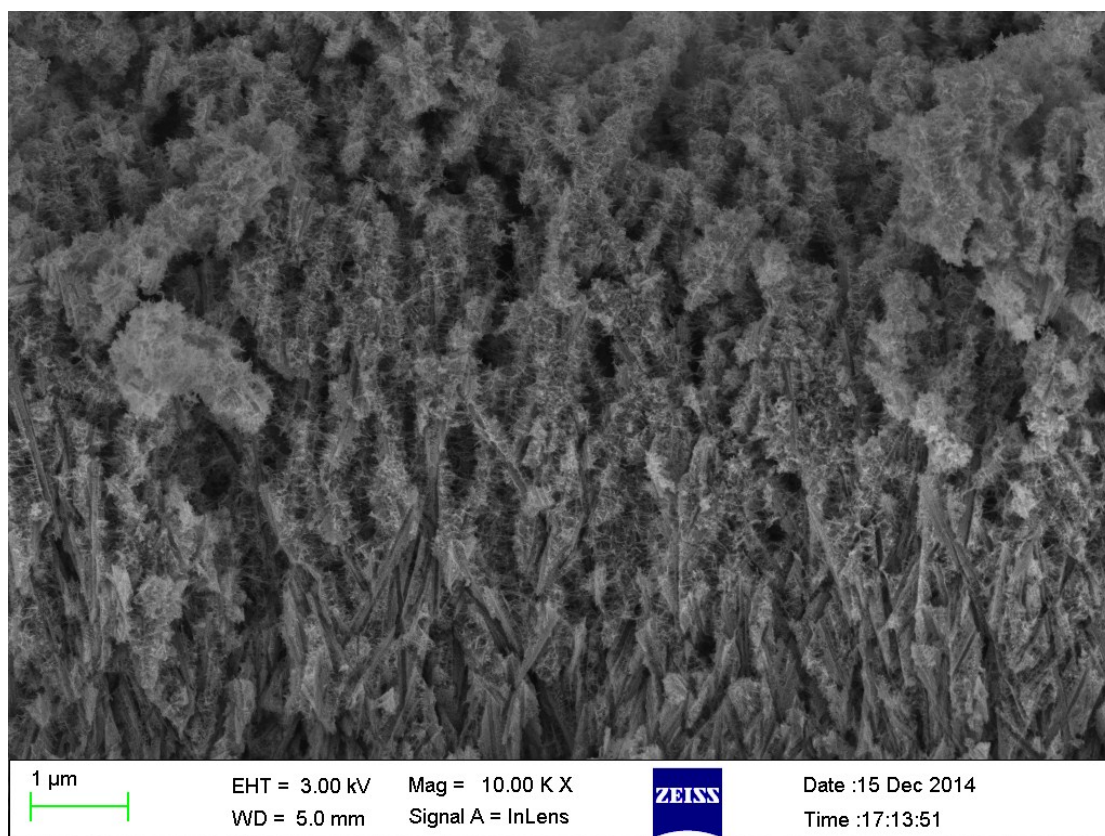

**Fig. S3.** Panorama SEM image of the cross-sectional view of HNT array.

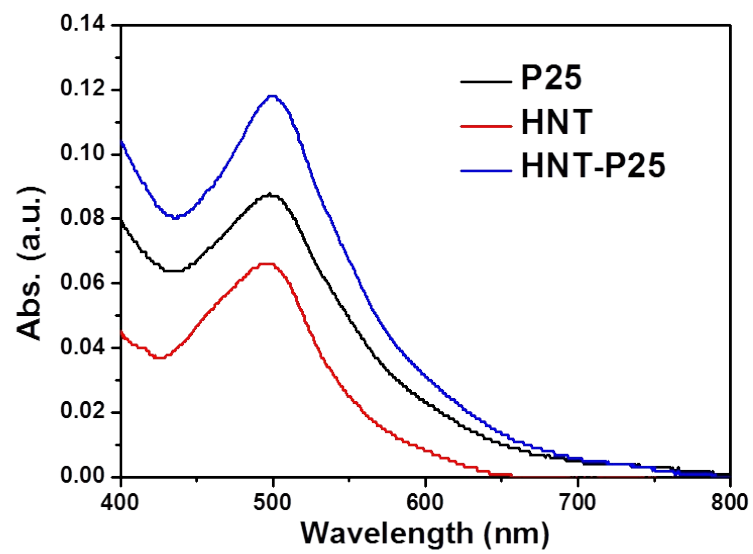

**Fig. S4.** UV-Vis absorption spectra of dye desorbed from different photoanodes (P25, HNT and HNT-P25).
